# Supplementary material for: A fluorine/oxygen co-doping scheme for biomass carbon provides excellent rapid reaction kinetics for sodium/potassium-ion batteries
Source: Royal Society of Chemistry journal article supplement (doi:10.1039/d4qi01110d), 2024-01-01
Supplement: d4qi01110d1.pdf [file d4qi01110d1.pdf]

## **A fluorine/oxygen co-doping scheme for biomass carbon provides excellent rapid reaction kinetics for sodium/potassium-ion batteries**

Liuchao Yang,<sup>‡<sup>a</sup></sup> Bin He,<sup>‡<sup>a</sup></sup> Mingxin Li,<sup>a</sup> Shenghu Li,<sup>a</sup> Dan Xiao,<sup>bc</sup>, Yujue Wang,<sup>b</sup> Yan Meng,<sup>c</sup> Qian Zhao,<sup>\*ab</sup> Qu Yue<sup>\*b</sup> and Wei Feng<sup>\*a</sup>

<sup>a</sup>School of Mechanical Engineering, Chengdu University, No. 2025, Chengluo Road, Chengdu 610106, PR China.

<sup>b</sup>Institute for Advanced Study, Chengdu University, Chengdu 610106, PR China.

<sup>c</sup>Institute of New Energy and Low-Carbon Technology, Sichuan University, Chengdu 610065, PR China.

\*Corresponding author.

E-mail addresses: [zhao\\_qian@cdu.edu.cn](mailto:zhao_qian@cdu.edu.cn) (Q. Zhao), [yuequ@cdu.edu.cn](mailto:yuequ@cdu.edu.cn) (Q. Yue), [fengwei@cdu.edu.cn](mailto:fengwei@cdu.edu.cn) (W. Feng).

<sup>‡</sup> These authors contributed equally to this work.

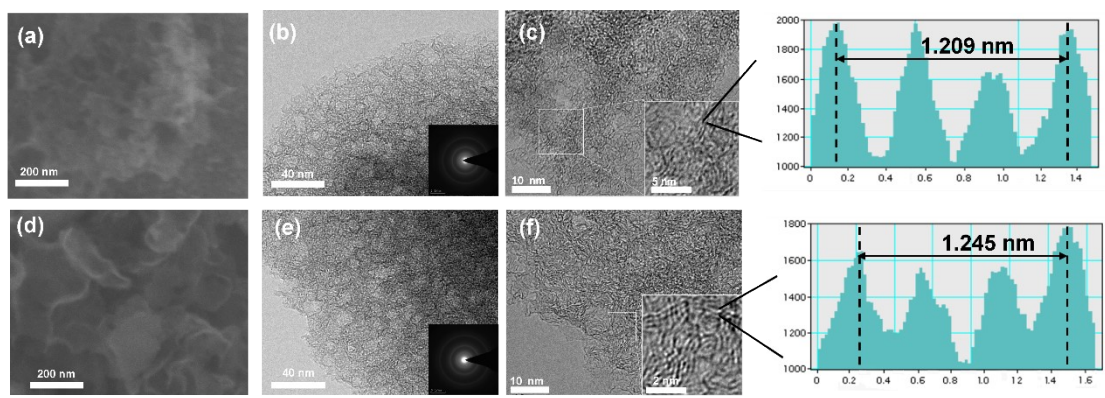

**Fig. S1** The SEM and TEM images and lattice fringes (insets) of (a-c) FO-HC1100 and (d-f) FO-HC1300.

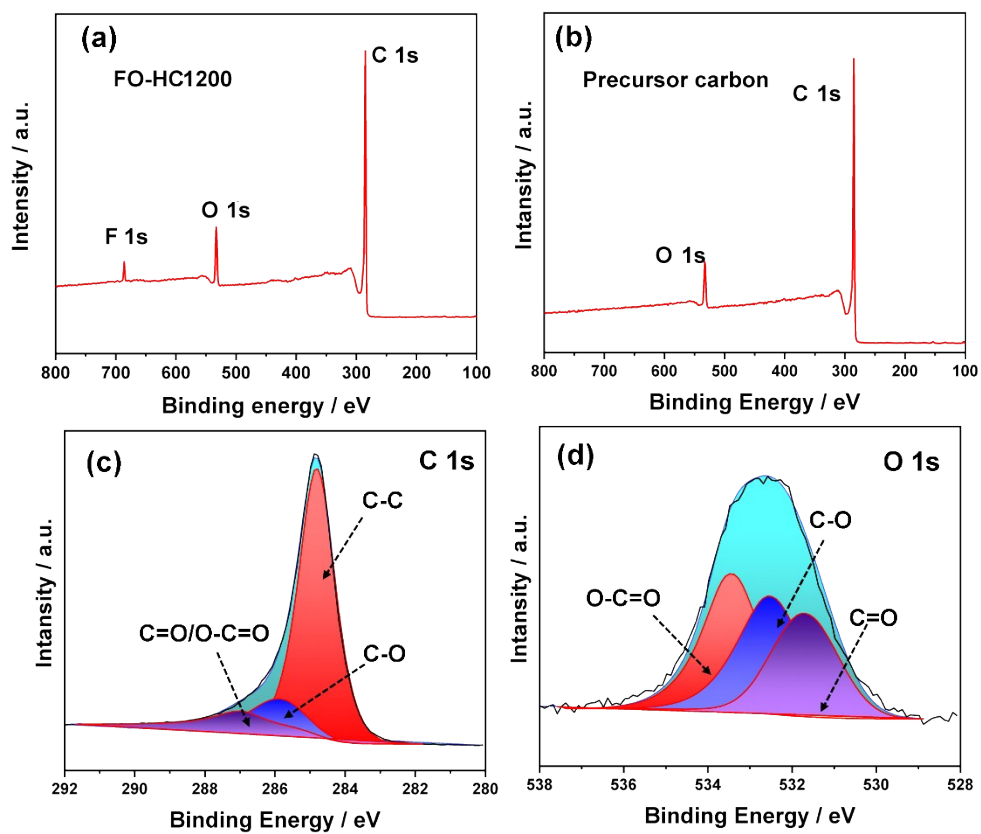

**Fig. S2** (a) XPS survey spectrums of the FO-HC1200, (b) XPS survey spectrum, (c) C 1s and (d) O 1s of precursor carbon without hydrothermal reaction.

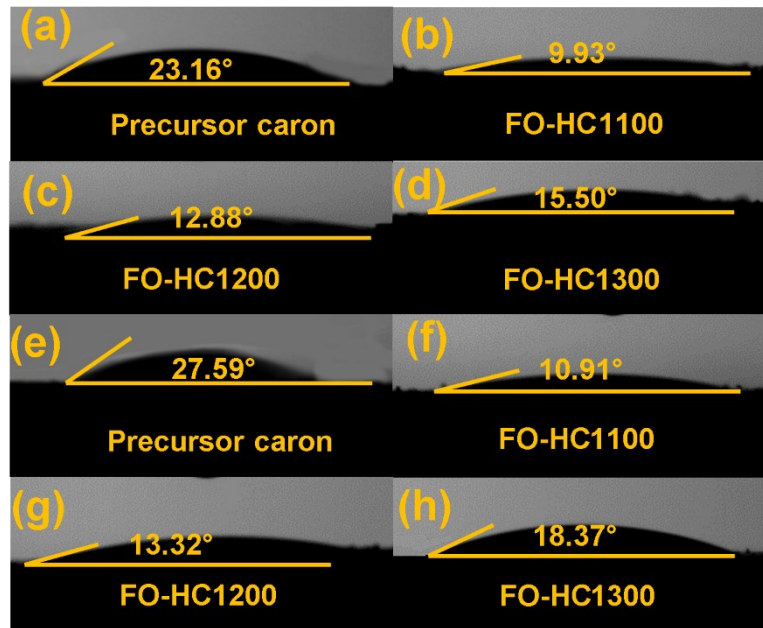

**Fig. S3** Wetting angle test of FO-HCs on (a-d) sodium battery electrolyte and (e-h) potassium battery electrolyte.

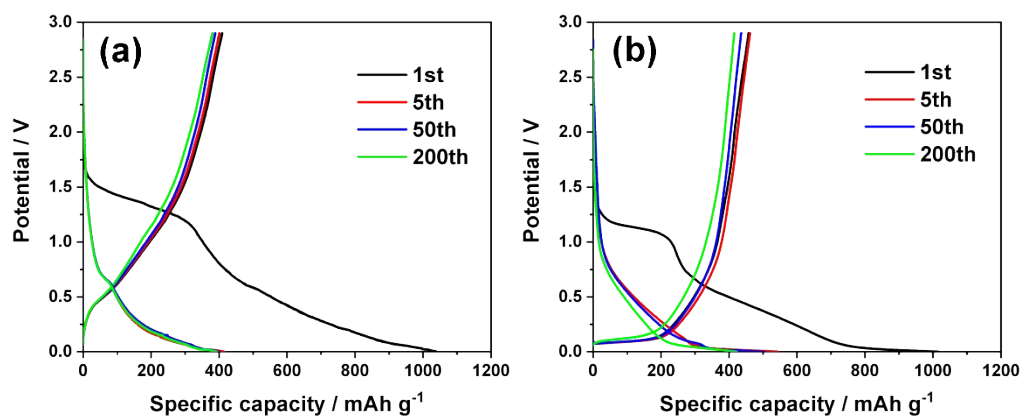

**Fig. S4** The GCD profiles from 1st to 200th cycle of FO-HC1200 assembly at 100 mA g<sup>-1</sup> in (a) PIB, (b) SIB.

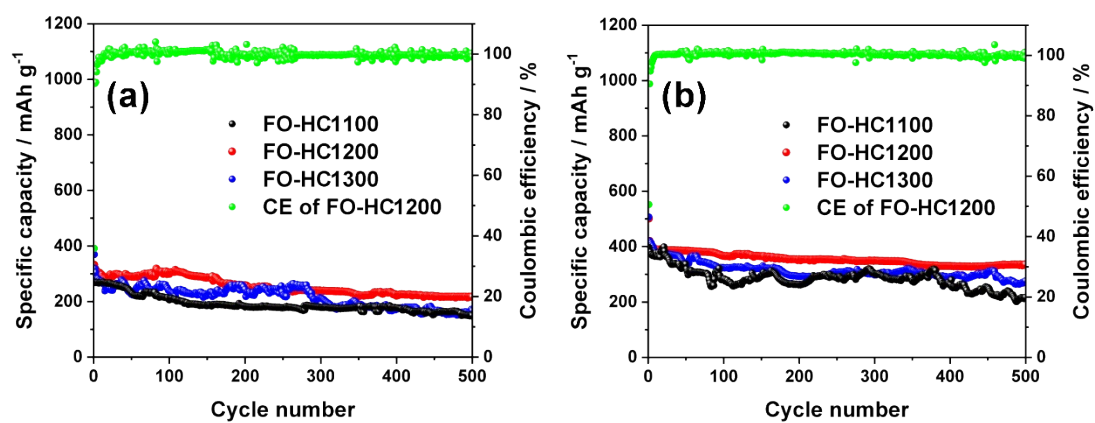

**Fig. S5** The Long cycle performance from 1st to 500th cycle of materials at different temperatures under  $1 \text{ A g}^{-1}$  in (a) PIB, (b) SIB.

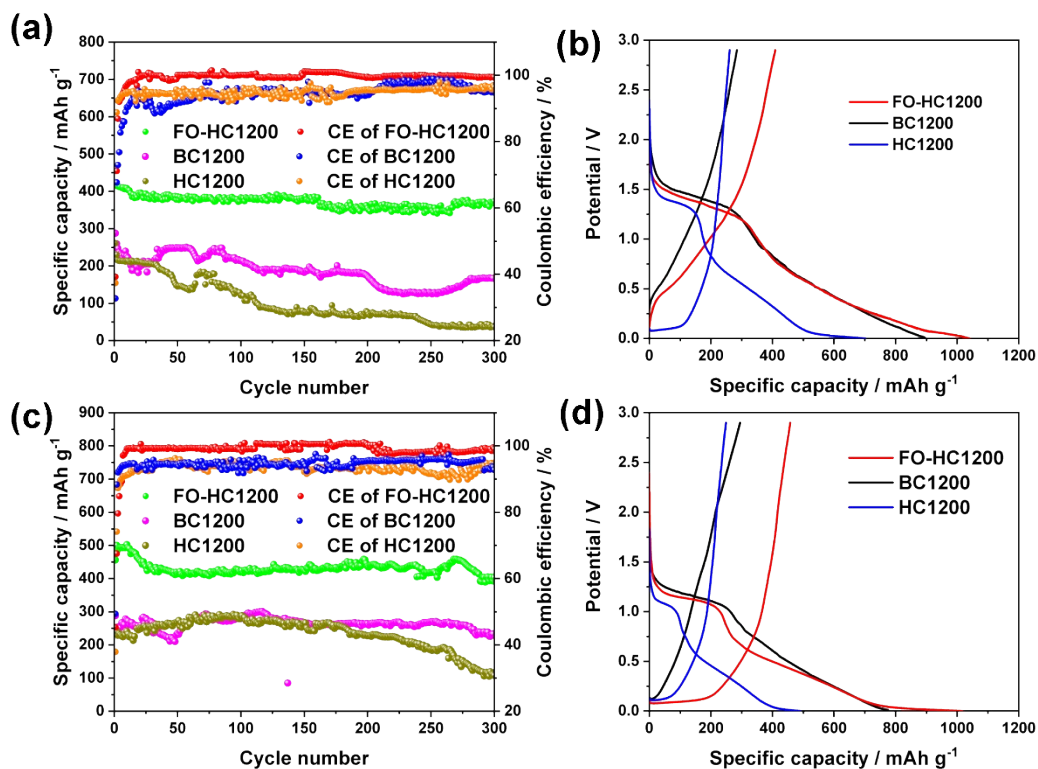

**Fig. S6** FO-HC1200, BC1200 and HC1200 as anode materials for PIBs (a, b) and SIBs (c, d) respectively, display the initial and cycling performance under the condition of 100 mA g<sup>-1</sup> current density. The carbon material obtained by using NaOH in the hydrothermal reaction process, with other preparation conditions unchanged, is called Blank Carbon (BC); the carbon material obtained without hydrothermal reaction and after secondary calcination is called Hard Carbon (HC).

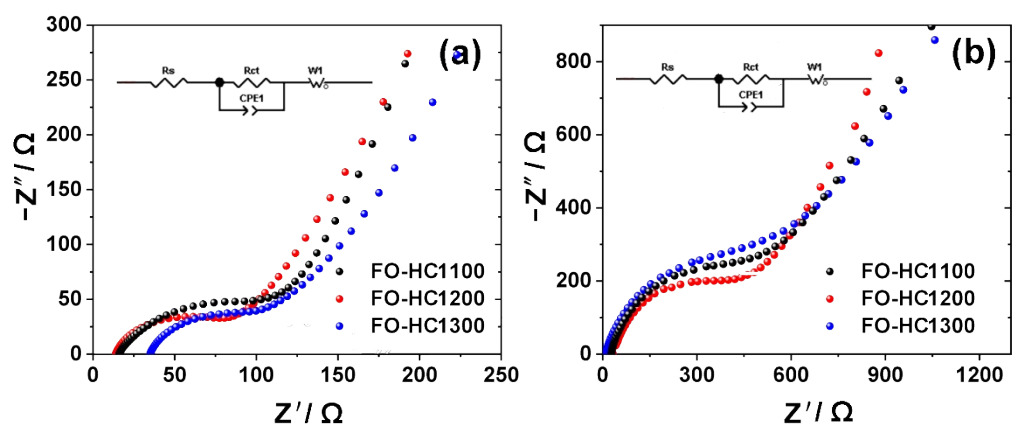

**Fig. S7** The Nyquist plots of the first cycle of materials at different temperatures in (a) SIB, (b) PIB.



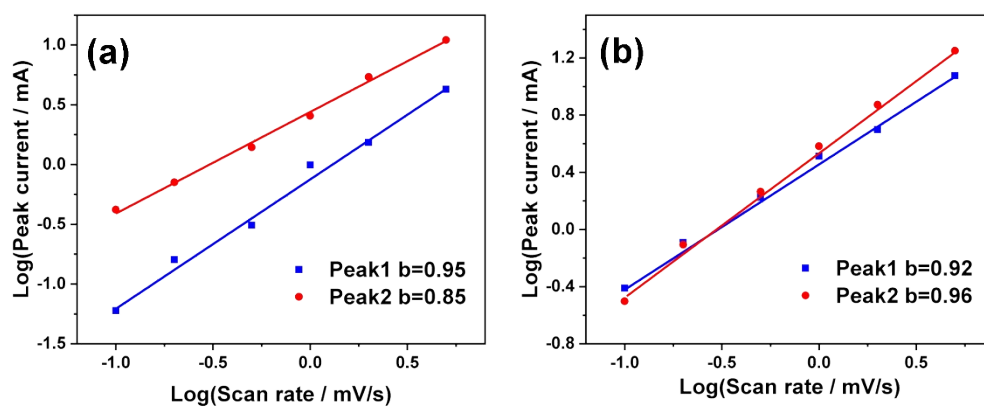

**Fig. S8** The calculation of the b-value (a) PIB, (b) SIB.

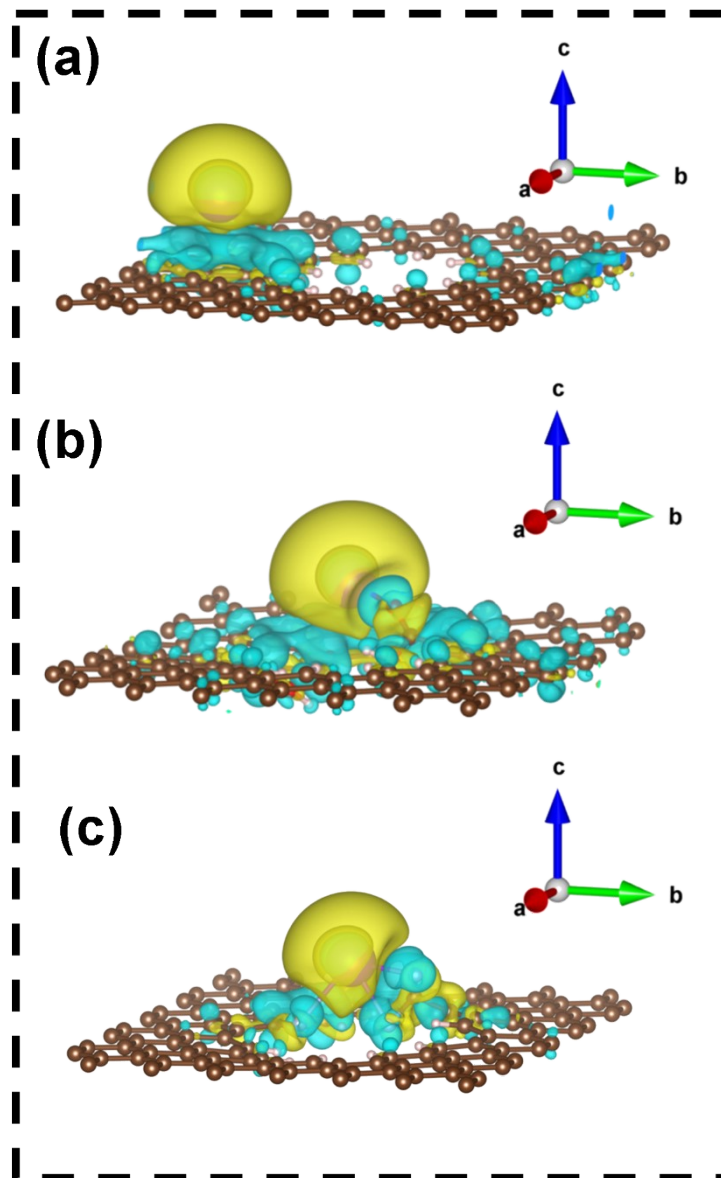

**Fig. S9** Differential charge side vie: (a) graphene layer, (b) O-doped hard carbon, (c) F-doped hard carbon.

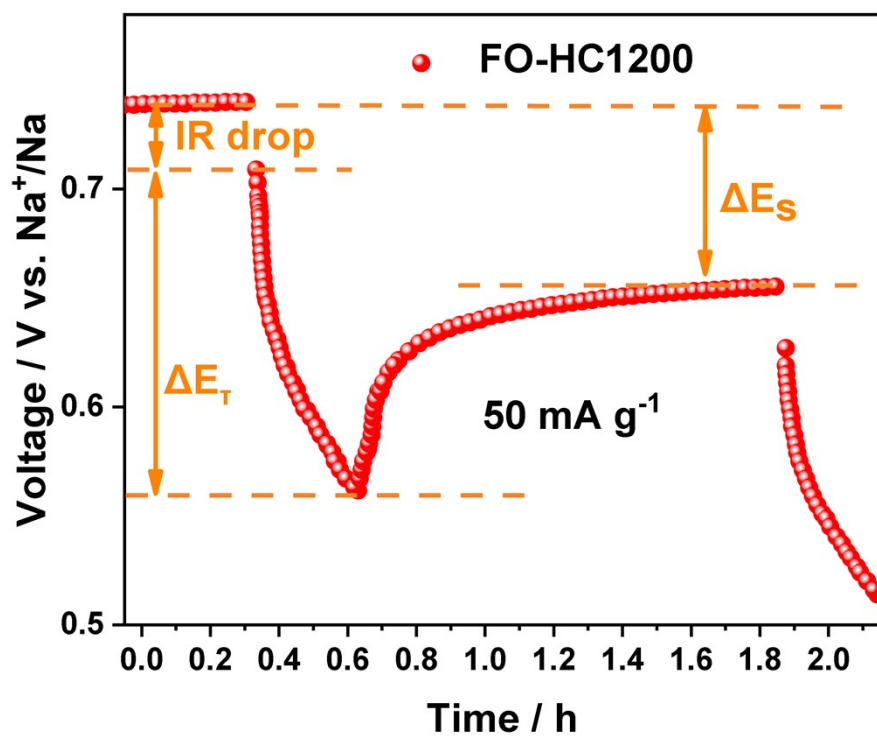

**Fig. S10** Schematic of the calculation of diffusion coefficient using the GITT technique.

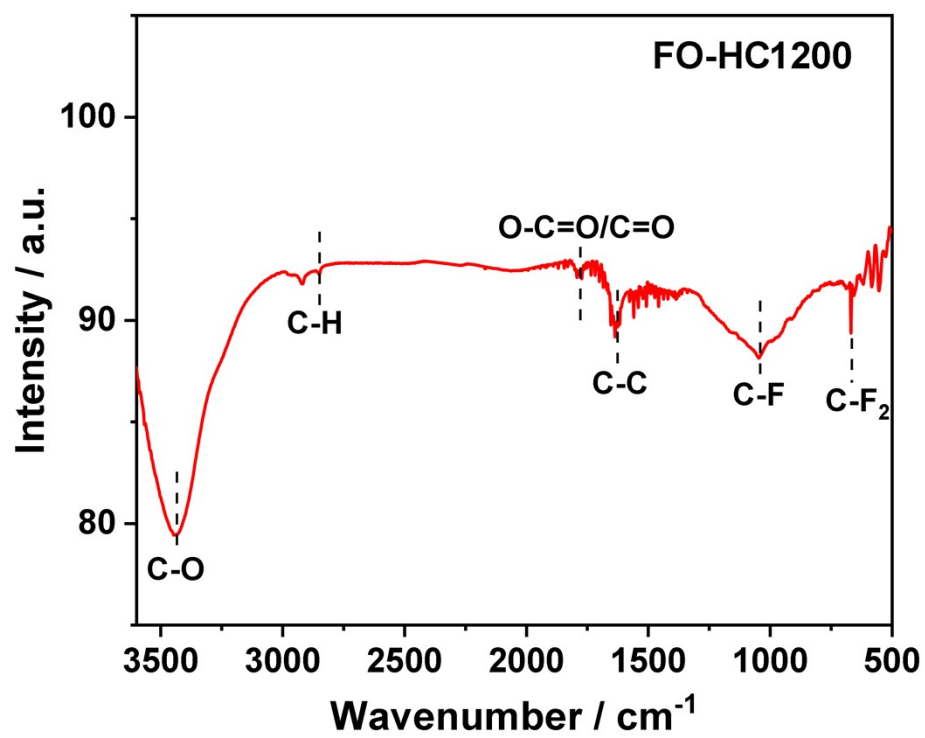

Fig. S11 The FTIR test curve of FO-HC 1200.

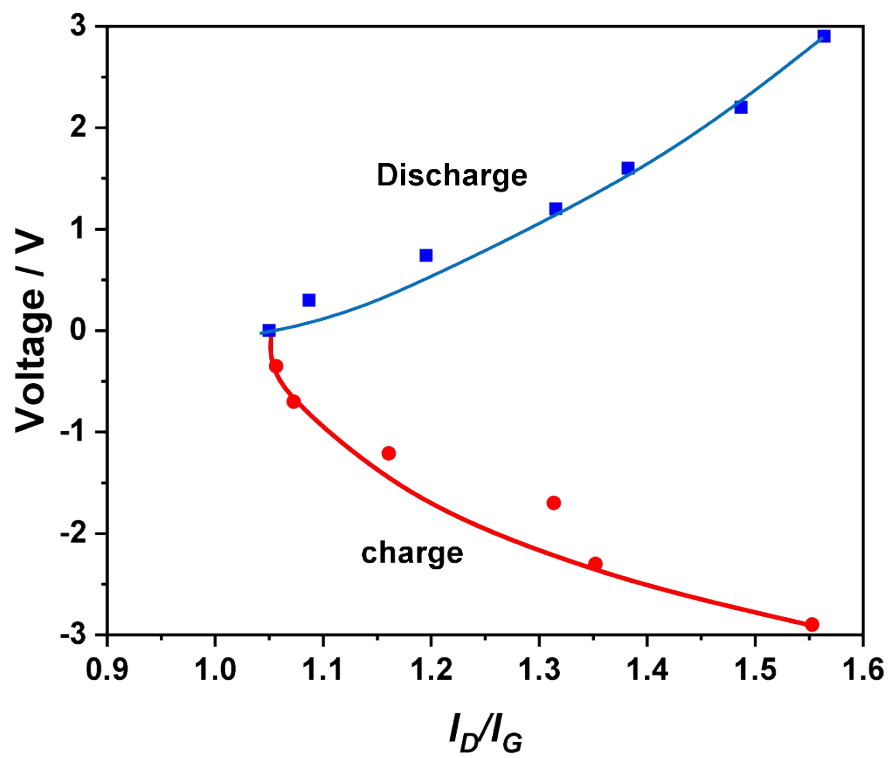

**Fig. S12** In-situ Raman spectra are used for the FO-HC1200 anode, including the change of  $I_D/I_G$  value at certain voltages.

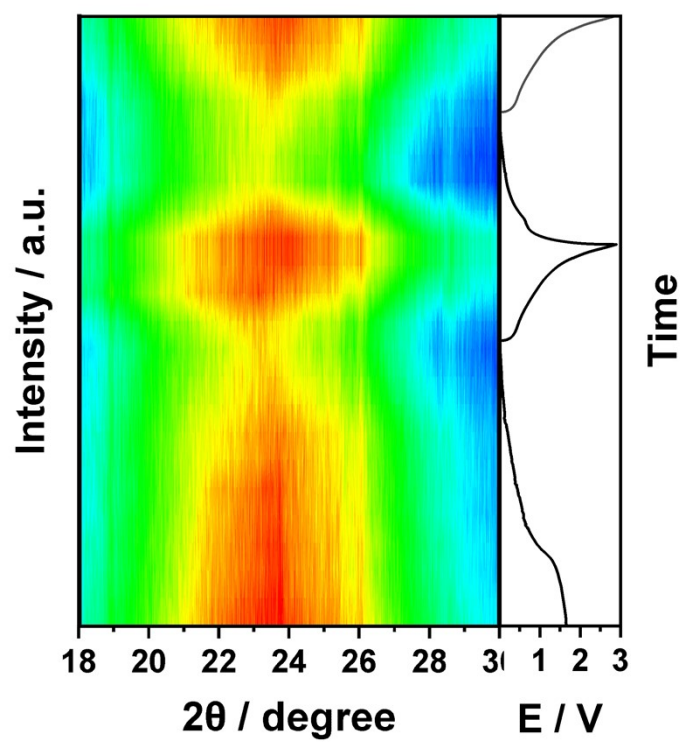

**Fig. S13** In-situ XRD Contour plot of FO-HC1200.

**Table S1** Textural properties of the samples of FO-HC1100, FO-HC1200 and FO-HC1300

| Samples   | $d_{(002)}/\text{nm}$ | $I_D/I_G$ | $S_{\text{BET}}$<br>( $\text{m}^2\text{g}^{-1}$ ) | $V_{\text{P}}$<br>( $\text{cm}^3\text{g}^{-1}$ ) |
|-----------|-----------------------|-----------|---------------------------------------------------|--------------------------------------------------|
| FO-HC1100 | 0.395                 | 1.02      | 379.1                                             | 0.72                                             |
| FO-HC1200 | 0.401                 | 1.07      | 356.2                                             | 0.67                                             |
| FO-HC1300 | 0.407                 | 1.09      | 323.6                                             | 0.59                                             |

**Table S2** Equivalent circuit parameters of the FO-HC1200 for PIBs/SIB after cycling.

| Type | Cycle number      | Rs/Ohm | Rct/Ohm |
|------|-------------------|--------|---------|
| PIBs | Pristine          | 188.3  | 969.3   |
|      | 5 <sup>th</sup>   | 163.5  | 871.3   |
|      | 50 <sup>th</sup>  | 149.3  | 536.4   |
|      | 300 <sup>th</sup> | 142.8  | 496.1   |
| SIBs | Pristine          | 31.7   | 203.5   |
|      | 5 <sup>th</sup>   | 22.4   | 96.4    |
|      | 50 <sup>th</sup>  | 15.2   | 53.7    |
|      | 300 <sup>th</sup> | 13.6   | 49.2    |



**Table S3** Peak assignment of C 1s, O 1s and F 1s for FO-HC1200

| Peak | BE/eV | Assignment       | Fraction of species/% |
|------|-------|------------------|-----------------------|
| C 1s | 284.8 | C-C              | 73.5                  |
|      | 285.8 | C-O              | 13.9                  |
|      | 287   | C=O/O-C=O        | 5.1                   |
|      | 288.7 | C-F              | 5.2                   |
|      | 290.5 | C-F <sub>2</sub> | 2.3                   |
| O 1s | 533.5 | O-C=O            | 29.4                  |
|      | 532.5 | C-O              | 46.7                  |
|      | 531.8 | C=O              | 23.9                  |
| F 1s | 689.1 | C-F              | 72.4                  |
|      | 690.2 | C-F <sub>2</sub> | 27.6                  |

**Table S4** Peak assignment of C 1s and O 1s for Precursor carbon

| Peak | BE/eV | Assignment | Fraction of species/% |
|------|-------|------------|-----------------------|
| C 1s | 284.8 | C-C        | 73.5                  |
|      | 285.6 | C-O        | 13.9                  |
|      | 287.2 | C=O/O-C=O  | 12.6                  |
| O 1s | 533.4 | O-C=O      | 29.4                  |
|      | 532.5 | C-O        | 46.7                  |
|      | 531.7 | C=O        | 23.9                  |

**Table S5** Electrochemical performance comparison of carbon anodes as PIBs in recent literatures with FO-HC1200.

| <b>Material</b>  | <b>Capacity<br/>(mAh g<sup>-1</sup>)</b> | <b>Current density<br/>(mA g<sup>-1</sup>)</b> | <b>Cycles</b>     | <b>Ref.</b>      |
|------------------|------------------------------------------|------------------------------------------------|-------------------|------------------|
| <b>CS-HC</b>     | 259.8                                    | 50                                             | 100               | 1                |
| <b>Bam-1300</b>  | 287.7                                    | 300                                            | 150               | 2                |
| <b>NPS-FCM</b>   | 162.1                                    | 1000                                           | 1000              | 3                |
| <b>NSHCM2</b>    | 294                                      | 200                                            | 1000              | 4                |
| <b>P-HC</b>      | 151.9                                    | 1000                                           | 2000              | 5                |
| <b>THC</b>       | 203                                      | 30                                             | 1000              | 6                |
| <b>NOPC-750</b>  | 309.8                                    | 100                                            | 2500              | 7                |
| <b>NO-YS-CS</b>  | 215                                      | 500                                            | 2500              | 8                |
| <b>N-CNC</b>     | 132.9                                    | 1000                                           | 200               | 9                |
| <b>PI-T-Pab</b>  | 146.1                                    | 100                                            | 100               | 10               |
| <b>FO-HC1200</b> | <b>347.2 / 216.3</b>                     | <b>100 / 1000</b>                              | <b>1000 / 500</b> | <b>This work</b> |

**Table S6** Electrochemical performance comparison of carbon anodes as SIBs in recent literatures with FO-HC1200.

| <b>Material</b>   | <b>Capacity<br/>(mAh g<sup>-1</sup>)</b> | <b>Current density<br/>(mA g<sup>-1</sup>)</b> | <b>Cycles</b>     | <b>Ref.</b>      |
|-------------------|------------------------------------------|------------------------------------------------|-------------------|------------------|
| <b>PC-1400</b>    | 250                                      | 50                                             | 50                | 11               |
| <b>HC-1300</b>    | 247.4                                    | 200                                            | 800               | 12               |
| <b>PB</b>         | 146.9                                    | 2000                                           | 600               | 13               |
| <b>SAL</b>        | 141.6                                    | 200                                            | 1000              | 14               |
| <b>SNS-1</b>      | 353                                      | 25                                             | 1000              | 15               |
| <b>S-Cmph-700</b> | 145.6                                    | 2000                                           | 500               | 16               |
| <b>LCS-73</b>     | 325                                      | 50                                             | 100               | 17               |
| <b>CSHP2</b>      | 215                                      | 100                                            | 100               | 18               |
| <b>HC-GLC</b>     | 320.7                                    | 150                                            | 100               | 19               |
| <b>HNC-550</b>    | 352.2                                    | 100                                            | 300               | 20               |
| <b>FO-HC1200</b>  | <b>386.5 / 336.4</b>                     | <b>100 / 1000</b>                              | <b>1000 / 500</b> | <b>This work</b> |

**Table S7** Peak positions of C 1s and K 2p in XPS

| Peak | Assignment                    | BE/eV  | 0nm    | BE/eV  | 15nm   | BE/eV  | 30nm   |       |
|------|-------------------------------|--------|--------|--------|--------|--------|--------|-------|
| C 1s | KC <sub>x</sub>               | 283.78 | 32.1%  | 283.91 | 47.3%  | 283.86 | 53.9%  |       |
|      | C-C                           | 284.80 | 36.7%  | 284.56 | 20.4%  | 284.47 | 24.3%  |       |
|      | C-O                           | 285.57 | 8.3%   | 285.41 | 11.6%  | 285.43 | 6.3%   |       |
|      | C=O                           | 286.45 | 8.1%   | 285.91 | 8.7%   | 286.07 | 5.1%   |       |
|      | CO <sub>3</sub> <sup>2-</sup> | 288.53 | 7.9%   | 288.15 | 4.5%   | 288.17 | 4.5%   |       |
|      | C-F <sub>2</sub>              | 289.65 | 6.9%   | 289.23 | 7.5%   | 289.05 | 5.9%   |       |
| K 2p | K-C                           | K2p1/2 | 296.23 | 20.5%  | 296.37 | 32.2%  | 296.44 | K 2p  |
|      |                               | K2p3/2 | 293.43 | 42.8%  | 293.70 | 26.9%  | 293.70 | 52.9% |
|      | K-F                           | K2p1/2 | 295.64 | 14.1%  | 295.59 | 28.2%  | 295.70 | 5.8%  |
|      |                               | K2p3/2 | 292.80 | 22.6%  | 292.92 | 12.1%  | 292.95 | 13.2% |
| O 1s | CO <sub>3</sub> <sup>2-</sup> | 532.30 | 74.6%  | 532.18 | 70.4%  | 531.95 | 63.3%  |       |
|      | C=O                           | 533.83 | 15.7%  | 533.61 | 19.7%  | 533.54 | 19.6%  |       |
|      | C-O                           | 535.26 | 9.7%   | 535.03 | 9.9%   | 535.76 | 17.1%  |       |
| F 1s | K-F                           | 684.65 | 84.0%  | 684.43 | 76.3%  | 684.21 | 72.9%  |       |
|      | KPF <sub>6</sub>              | 686.37 | 10.2%  | 686.75 | 9.9%   | 686.29 | 12.4%  |       |
|      | C-F <sub>2</sub>              | 688.94 | 5.8%   | 688.35 | 13.8%  | 689.13 | 14.7%  |       |

## References

1. L. Tan, J. Chen, L. Wang, N. Li, Y. Yang, Y. Chen, L. Guo, X. Ji and Y. Zhu, High-Coulombic-Efficiency Hard Carbon Anode Material for Practical Potassium-ion Batteries, *Batteries & Supercaps*, 2024, e202400010.
2. J. Kuai, J. Xie, J. Wang, J. Chen, F. Liu, X. Xu, J. Tu and J. Cheng, Comparison and Optimization of Biomass-Derived Hard Carbon as Anode Materials for Sodium-Ion Batteries, *Chemical Physics Letters*, 2024, **842**, 141214.
3. X. Zhang, R. Huang, F. Wu, R. Chen and L. Li, Mixed-biomass engineering achieves multi-doped highly-disordered hierarchical flower-like hard carbon for advanced potassium-ion battery, *Nano Energy*, 2023, **117**, 108913.
4. D. Zhang, B. Niu, Y. Li, Z. Li, H. Wang, Q. Wang, F. Yuan, Z. Hu and B. Wang, Sulfur-grafted hard carbon with expanded interlayer spacing and increased defects for high stability potassium-ion batteries, *Solid State Ionics*, 2023, **393**, 116172.
5. N. Shen, Q. Lai, N. Chen, Y. Pang, H. Chen, W. Zhang and Z. Liu, Hard Carbon Anode Synthesized by an In Situ Porous Strategy for Advanced Potassium-ion Batteries, *ACS Sustainable Chemistry & Engineering*, 2023, **11**, 14572-14581.
6. J. Zou, C. He, J. Bao, C. Sun and Y. Li, Hard carbon derived from spent black tea as a high-stability anode for potassium-ion batteries, *Ionics*, 2023, **29**, 3517-3523.
7. Y. Guo, Y. Feng, H. Li, Y. Wang, Z. Wen and G. Zhou, Carbon quantum dots in hard carbon: An approach to achieving PIB anodes with high potassium adsorption, *Carbon*, 2022, **189**, 142-151.
8. S. Chong, L. Yuan, T. Li, C. Shu, S. Qiao, S. Dong, Z. Liu, J. Yang, H. K. Liu and S. X. Dou, Nitrogen and oxygen Co-doped porous hard carbon nanospheres with core-shell architecture as anode materials for superior potassium-ion storage, *Small*, 2022, **18**, 2104296.
9. F. Yuan, H. Sun, D. Zhang, Z. Li, J. Wang, H. Wang, Q. Wang, Y. Wu and B. Wang, Enhanced electron transfer and ion storage in phosphorus/nitrogen co-doped 3D interconnected carbon nanocage toward potassium-ion battery, *Journal of Colloid and Interface Science*, 2022, **611**, 513-522.
10. M. Wang, YouyuZhang, YangYang, TingDuan, JingyingWang, Chengyang, Cost-effective hard-soft carbon composite anodes with promising potassium ions storage performance, *Electrochimica Acta*, 2021, **368**, 137649.
11. X. Liu, H. Liu, R. Yuan, L. Shang, T. Liu, W. Wang, Y. Miao, X. Chen and H. Song, Potato-starch-based hard carbon microspheres: Preparation and application as an anode material for sodium-ion batteries, *Solid State Ionics*, 2024, **406**, 116475.
12. X. Zhang, Y. Cao, G. Li, G. Liu, X. Dong, Y. Wang, X. Jiang, X. Zhang and Y. Xia, Exploring Carbonization Temperature to Create Closed Pores for Hard Carbon as High-Performance Sodium-Ion Battery Anodes, *Small*, 2024, 2311197.
13. L. Yu, L. Zhang, X. He, X. Tao, G. Zhao, H. Xie, R. Zhu and G. Zhu, Study of stable sodium ion storage in porous carbon derived from puffball biomass, *Industrial Crops and Products*, 2024, **208**, 117805.
14. H. Wei, H. Cheng, N. Yao, G. Li, Z. Du, R. Luo and Z. Zheng, Invasive alien plant biomass-derived hard carbon anode for sodium-ion batteries, *Chemosphere*, 2023, **343**, 140220.
15. B. Rao, Y. Saisrinu, S. Khatua, K. Bharathi and L. Patro, Nitrogen doped soap-nut seeds derived hard carbon as an efficient anode material for Na-ion batteries, *Journal of Alloys and Compounds*, 2023, **968**, 171917.

16. N. T. Aristote, C. Liu, X. Deng, H. Liu, J. Gao, W. Deng, H. Hou and X. Ji, Sulfur-doping biomass based hard carbon as high performance anode material for sodium-ion batteries, *Journal of Electroanalytical Chemistry*, 2022, **923**, 116769.
17. H. Chen, N. Sun, Q. Zhu, R. A. Soomro and B. Xu, Microcrystalline Hybridization Enhanced Coal-Based Carbon Anode for Advanced Sodium-ion Batteries, *Advanced science (Weinheim, Baden-Wurttemberg, Germany)*, 2022, **9**, e2200023.
18. S. Chen, K. Tang, F. Song, Z. Liu, N. Zhang, S. Lan, X. Xie and Z. Wu, Porous hard carbon spheres derived from biomass for high-performance sodium/potassium-ion batteries, *Nanotechnology*, 2022, **33**, 55401.
19. X. Li, J. Sun, W. Zhao, Y. Lai, X. Yu and Y. Liu, Intergrowth of Graphite-Like Crystals in Hard Carbon for Highly Reversible Na-ion Storage, *Advanced Functional Materials*, 2022, **32**, 2106980.
20. R. Huang, Y. Cao and S. Qin, Ultra-high N-doped open hollow carbon nano-cage with excellent Na<sup>+</sup> and K<sup>+</sup> storage performances, *Materials Today Nano*, 2022, **18**, 100217.
